# Supplementary material
Source: PubMed Central journal article supplement (PMC4749496)
Supplement: 15_142_Hanes_Suppl.pdf [file 15_142_Hanes_Suppl.pdf]

Supplemental Data

Galantamine Attenuates Type 1 Diabetes and Inhibits Anti-Insulin Antibodies in Nonobese Diabetic Mice

William M Hanes,<sup>1,2</sup> Peder S Olofsson,<sup>1</sup> Kevin Kwan,<sup>1</sup> LaQueta K Hudson,<sup>1</sup> Sangeeta S Chavan,<sup>1</sup> Valentin A Pavlov,<sup>1</sup> and Kevin J Tracey<sup>1</sup>

Online address: <http://www.molmed.org>

The Feinstein Institute for Medical Research North Shore LIJ  
Empowering Imagination. Pioneering Discovery.®

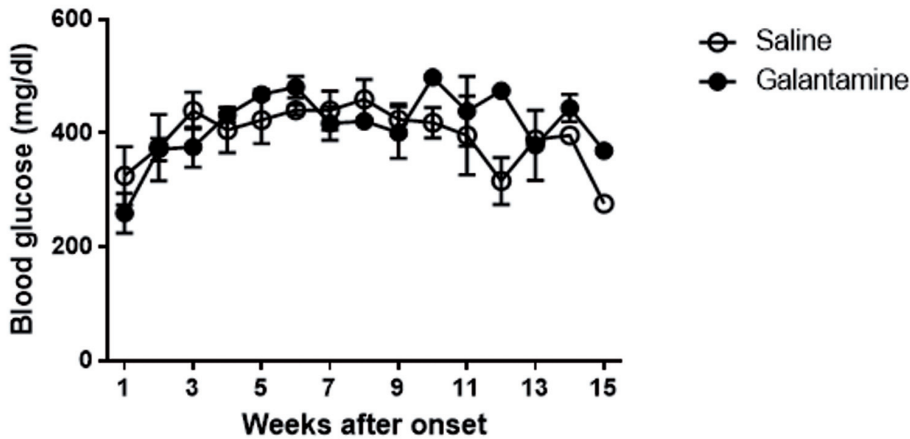

**Supplementary Figure S1.** Galantamine fails to treat established diabetes. 1 mg/kg galantamine (n=9) or saline (n=6) was administered IP to mice with two consecutive weekly glucose measurements >199 mg/dl.
